# Supplementary material for: Com evitar expressions castellanes
Source: Springer Nature journal article supplement (doi:10.1038/nrn2774), 2004-01-01
Supplement: 41583_2010_BFnrn2774_MOESM248_ESM.pdf [file 41583_2010_BFnrn2774_MOESM248_ESM.pdf]

**Supplementary information S1 (table)**

**Abnormal Neural Oscillations and Synchrony in Schizophrenia**

| Measure                               | Frequency | Effect in chronic patients      | Effect in first episode patients | Effect in unaffected family members |
|---------------------------------------|-----------|---------------------------------|----------------------------------|-------------------------------------|
| <b>Steady-state evoked potentials</b> |           |                                 |                                  |                                     |
| <b>Amplitude</b>                      | $\theta$  |                                 |                                  |                                     |
|                                       | $\alpha$  |                                 |                                  |                                     |
|                                       | $\beta$   | ↓ <sup>1</sup> ↑ <sup>2</sup> * |                                  |                                     |
|                                       | $\gamma$  | ↓ <sup>2-9</sup> ***            | ↓ <sup>7</sup> *                 | ↓ <sup>10</sup> *                   |
| <b>Phase</b>                          | $\theta$  |                                 |                                  |                                     |
|                                       | $\alpha$  | ↓ <sup>5</sup> *                |                                  |                                     |
|                                       | $\beta$   |                                 |                                  |                                     |
|                                       | $\gamma$  | ↓ <sup>5,8</sup> *              | ↓ <sup>7</sup> *                 |                                     |
| <b>Evoked responses</b>               |           |                                 |                                  |                                     |
| <b>Amplitude</b>                      | $\theta$  | ↓ <sup>11</sup> *               |                                  | ↓ <sup>11</sup> *                   |
|                                       | $\alpha$  | ↓ <sup>11</sup> *               |                                  | ↓ <sup>11</sup> *                   |
|                                       | $\beta$   | ↓ <sup>12</sup> *               |                                  |                                     |
|                                       | $\gamma$  | ↓ <sup>12-18</sup> *            | ↓ <sup>19</sup> *                |                                     |
| <b>Phase</b>                          | $\theta$  |                                 |                                  |                                     |
|                                       | $\alpha$  |                                 |                                  |                                     |
|                                       | $\beta$   |                                 |                                  |                                     |
|                                       | $\gamma$  | ↓ <sup>14-18, 20</sup> **       |                                  |                                     |
| <b>Induced oscillations</b>           |           |                                 |                                  |                                     |
| <b>Amplitude</b>                      | $\theta$  | ↓ <sup>21</sup> *               |                                  |                                     |
|                                       | $\alpha$  |                                 |                                  |                                     |
|                                       | $\beta$   |                                 |                                  |                                     |
|                                       | $\gamma$  | ↓ <sup>22-24</sup> *            |                                  |                                     |
| <b>Phase</b>                          | $\theta$  |                                 |                                  |                                     |
|                                       | $\alpha$  |                                 |                                  |                                     |
|                                       | $\beta$   | ↓ <sup>25</sup> *               |                                  |                                     |
|                                       | $\gamma$  | ↓ <sup>18, 25, 26</sup> **      | ↓ <sup>26</sup> *                |                                     |
| <b>Resting state</b>                  |           |                                 |                                  |                                     |
| <b>Amplitude</b>                      | $\theta$  | ↑ <sup>27</sup> **              |                                  |                                     |
|                                       | $\alpha$  |                                 |                                  |                                     |
|                                       | $\beta$   |                                 |                                  |                                     |
|                                       | $\gamma$  | ↓ <sup>28</sup> *               |                                  |                                     |
| <b>Phase</b>                          | $\theta$  | ↓ <sup>29</sup> *               |                                  |                                     |
|                                       | $\alpha$  |                                 |                                  |                                     |
|                                       | $\beta$   |                                 |                                  |                                     |
|                                       | $\gamma$  |                                 |                                  |                                     |

\*, preliminary evidence; \*\*, consistent evidence; \*\*\*, robust evidence

## References

1. Krishnan, G.P. et al. Steady state visual evoked potential abnormalities in schizophrenia. *Clin Neurophysiol* **116**, 614-624 (2005).
2. Vierling-Claassen, D., Siekmeier, P., Stufflebeam, S. & Kopell, N. Modeling GABA alterations in schizophrenia: a link between impaired inhibition and altered gamma and beta range auditory entrainment. *J Neurophysiol* **99**, 2656-2671 (2008).
3. Light, G.A. et al. Gamma band oscillations reveal neural network cortical coherence dysfunction in schizophrenia patients. *Biol Psychiatry* **60**, 1231-1240 (2006).
4. Kwon, J.S. et al. Gamma frequency-range abnormalities to auditory stimulation in schizophrenia. *Arch Gen Psychiatry* **56**, 1001-1005 (1999).
5. Krishnan, G.P. et al. Steady state and induced auditory gamma deficits in schizophrenia. *Neuroimage* **47**, 1711-1719 (2009).
6. Brenner, C.A., Sporns, O., Lysaker, P.H. & O'Donnell, B.F. EEG synchronization to modulated auditory tones in schizophrenia, schizoaffective disorder, and schizotypal personality disorder. *Am J Psychiatry* **160**, 2238-2240 (2003).
7. Spencer, K. M., Salisbury, D.F., Shenton, M.E., McCarley, R.W. Gamma-band auditory steady-state responses are impaired in first episode psychosis. *Biol. Psychiatry* **64**, 369-75 (2008).
8. Spencer, K.M., Niznikiewicz, M.A., Nestor, P.G., Shenton, M.E. & McCarley, R.W. Left auditory cortex gamma synchronization and auditory hallucination symptoms in schizophrenia. *BMC Neurosci* **10**, 85 (2009).
9. Wilson, T. W. et al. Cortical gamma generators suggest abnormal auditory circuitry in early-onset psychosis. *Cereb. Cortex* **18**, 371-8 (2008).
10. Hong, L.E. et al. Evoked gamma band synchronization and the liability for schizophrenia. *Schizophr Res* **70**, 293-302 (2004).
11. Hong, L. E. et al. Sensory gating endophenotype based on its neural oscillatory pattern and heritability estimate. *Arch. Gen. Psychiatry* **65**, 1008-16 (2008).
12. Hirano, S. et al. Abnormal neural oscillatory activity to speech sounds in schizophrenia: a magnetoencephalography study. *J Neurosci* **28**, 4897-4903 (2008).
13. Johannesen, J.K., Bodkins, M., O'Donnell, B.F., Shekhar, A. & Hetrick, W.P. Perceptual anomalies in schizophrenia co-occur with selective impairments in the gamma frequency component of midlatency auditory ERPs. *J Abnorm Psychol* **117**, 106-118 (2008).
14. Spencer, K. M. et al. Neural synchrony indexes disordered perception and cognition in schizophrenia. *Proc. Natl. Acad. Sci. U S A* **101**, 17288-93 (2004).
15. Roach, B.J. & Mathalon, D.H. Event-related EEG time-frequency analysis: an overview of measures and an analysis of early gamma band phase locking in schizophrenia. *Schizophr Bull* **34**, 907-926 (2008).
16. Spencer, K. M., Niznikiewicz, M. A., Shenton, M. E. & McCarley, R. W. Sensory-evoked gamma oscillations in chronic schizophrenia. *Biol. Psychiatry* **63**, 744-7. (2008).

17. Ferrarelli, F. et al. Reduced evoked gamma oscillations in the frontal cortex in schizophrenia patients: a TMS/EEG study. *Am J Psychiatry* **165**, 996-1005 (2008).
18. Spencer, K. M. et al. Abnormal neural synchrony in schizophrenia. *J. Neurosci.* **23**, 7407-11 (2003).
19. Gallinat, J., Winterer, G., Herrmann, C.S. & Senkowski, D. Reduced oscillatory gamma-band responses in unmedicated schizophrenic patients indicate impaired frontal network processing. *Clin Neurophysiol* **115**, 1863-1874 (2004).
20. Ford, J.M., Roach, B.J., Faustman, W.O. & Mathalon, D.H. Out-of-Synch and Out-of-Sorts: Dysfunction of Motor-Sensory Communication in Schizophrenia. *Biol Psychiatry* (2007).
21. Schmiedt, C., Brand, A., Hildebrandt, H. & Basar-Eroglu, C. Event-related theta oscillations during working memory tasks in patients with schizophrenia and healthy controls. *Brain Res Cogn Brain Res* **25**, 936-947 (2005).
22. Tillmann, C., M. Wibrals, M. Leweke, A. Kohler, W. Singer, D. Koethe, L. Kranaster, K. Maurer & P. J. Uhlhaas Source localization of high-frequency oscillations reveals widespread reductions in gamma-band activity during perceptual organisation in chronic and first-episode schizophrenia. *Society for Neuroscience Online Abstract* **54.2** (2008).
23. Haenschel, C. Bittner, R.A., Waltz, J., Haertling, F., Wibrals, M., Singer, W., Linden, D.E.J., Rodriguez, E. Cortical oscillatory activity is critical for working memory as revealed by deficits in early onset schizophrenia *The Journal of Neuroscience* **29**, 9481-9489 (2009).
24. Cho, R. Y., Konecky, R. O. & Carter, C. S. Impairments in frontal cortical gamma synchrony and cognitive control in schizophrenia. *Proc. Natl. Acad. Sci. U S A* **103**, 19878-83 (2006).
25. Uhlhaas, P.J. et al. Dysfunctional long-range coordination of neural activity during Gestalt perception in schizophrenia. *J Neurosci* **26**, 8168-8175 (2006).
26. Symond, M. P., Harris, A. W., Gordon, E. & Williams, L. M. "Gamma synchrony" in first-episode schizophrenia: a disorder of temporal connectivity? *Am. J. Psychiatry* **162**, 459-65 (2005).
27. Boutros, N.N. et al. The status of spectral EEG abnormality as a diagnostic test for schizophrenia. *Schizophr Res* **99**, 225-237 (2008).
28. Rutter, L. et al. Magnetoencephalographic gamma power reduction in patients with schizophrenia during resting condition. *Hum Brain Mapp* **30**, 3254-64 (2009).
29. Koenig, T. et al. Decreased functional connectivity of EEG theta-frequency activity in first-episode, neuroleptic-naive patients with schizophrenia: preliminary results. *Schizophr Res* **50**, 55-60 (2001).
